# Supplementary material for: Deactivation of bimetallic nickel–copper alloy catalysts in thermocatalytic decomposition of methane
Source: Royal Society of Chemistry journal article supplement (doi:10.1039/c8cy00339d), 2018-01-01
Supplement: c8cy00339d1.pdf [file c8cy00339d1.pdf]

## Supporting Information

### Deactivation of bimetallic nickel-copper alloy catalyst in thermocatalytic decomposition of methane

Yi Shen<sup>\*a</sup>, Moyan Ge,<sup>a</sup> and Aik Chong Lua<sup>\*b</sup>

<sup>a</sup>School of Food Science and Engineering, South China University of Technology, Guangzhou, 510640, P. R. China, Tel.& Fax: +86 2087113843; Email: feyshen@scut.edu.cn

<sup>b</sup>School of Mechanical and Aerospace Engineering, Nanyang Technological University, 50 Nanyang Avenue, 639798, Republic of Singapore, Tel.:+65 67905535; Email: maclua@ntu.edu.sg

---

\* Corresponding authors E-mail: feyshen@scut.edu.cn (Y. Shen) and maclua@ntu.edu.sg (A.C. Lua)

**Table S1** Carbon yields and life span of the catalysts

| Sample                                 | Temperature (°C) | Average carbon deposition rate (mg <sub>C</sub> /(g <sub>Ni</sub> s). | Life span (h) | Theoretical carbon yield (g/g <sub>Ni</sub> ) | Actual carbon yield (g/g <sub>Ni</sub> ) |
|----------------------------------------|------------------|-----------------------------------------------------------------------|---------------|-----------------------------------------------|------------------------------------------|
| Ni/CNT                                 | 500              | 1.85                                                                  | >64*          | >424*                                         | 401*                                     |
|                                        | 550              | 2.86                                                                  | 53            | 552                                           | 532                                      |
|                                        | 575              | 3.85                                                                  | 27            | 377                                           | 358                                      |
|                                        | 600              | 5.14                                                                  | 10            | 182                                           | 158                                      |
| Ni <sub>87</sub> Cu <sub>13</sub> /CNT | 600              | 2.72                                                                  | >46*          | >462*                                         | 451*                                     |
|                                        | 650              | 4.33                                                                  | 36            | 579                                           | 562                                      |
|                                        | 700              | 4.82                                                                  | 29            | 503                                           | 496                                      |
| Ni <sub>78</sub> Cu <sub>22</sub> /CNT | 600              | 3.48                                                                  | >48*          | >607*                                         | 601*                                     |
|                                        | 650              | 4.46                                                                  | 48            | 768                                           | 718                                      |
|                                        | 700              | 5.26                                                                  | 32            | 614                                           | 602                                      |
|                                        | 750              | 5.54                                                                  | 13            | 271                                           | 230                                      |
| Ni <sub>58</sub> Cu <sub>42</sub> /CNT | 650              | 4.67                                                                  | 32            | 566                                           | 539                                      |
|                                        | 700              | 4.99                                                                  | 29            | 529                                           | 506                                      |
|                                        | 750              | 5.19                                                                  | 13            | 279                                           | 243                                      |
| Ni <sub>47</sub> Cu <sub>53</sub> /CNT | 650              | 4.32                                                                  | 32            | 538                                           | 498                                      |
|                                        | 700              | 4.37                                                                  | 26            | 415                                           | 407                                      |
|                                        | 750              | 4.72                                                                  | 12            | 234                                           | 206                                      |

**Table S2** Structural properties of the resulting carbon nanofibers

| Sample                                 | Temperature (°C) | I <sub>D</sub> /I <sub>G</sub> (nm) | BET surface area (m <sup>2</sup> /g) | Pore volume (cm <sup>3</sup> /g) |
|----------------------------------------|------------------|-------------------------------------|--------------------------------------|----------------------------------|
| Ni/CNT                                 | 500              | 0.71                                | 64                                   | 0.21                             |
|                                        | 550              | 0.74                                | 70                                   | 0.21                             |
|                                        | 575              | 0.76                                | 82                                   | 0.24                             |
|                                        | 600              | 0.78                                | 86                                   | 0.25                             |
| Ni <sub>87</sub> Cu <sub>13</sub> /CNT | 600              | 0.79                                | 98                                   | 0.25                             |
|                                        | 650              | 0.83                                | 110                                  | 0.27                             |
|                                        | 700              | 0.83                                | 114                                  | 0.33                             |
| Ni <sub>78</sub> Cu <sub>22</sub> /CNT | 600              | 0.81                                | 107                                  | 0.32                             |
|                                        | 650              | 0.87                                | 112                                  | 0.36                             |
|                                        | 700              | 0.92                                | 134                                  | 0.36                             |
|                                        | 750              | 1.1                                 | 142                                  | 0.38                             |
| Ni <sub>58</sub> Cu <sub>42</sub> /CNT | 650              | 0.94                                | 127                                  | 0.37                             |
|                                        | 700              | 1.38                                | 192                                  | 0.44                             |
|                                        | 750              | 1.47                                | 246                                  | 0.46                             |
| Ni <sub>47</sub> Cu <sub>53</sub> /CNT | 650              | 1.01                                | 213                                  | 0.37                             |
|                                        | 700              | 1.52                                | 237                                  | 0.47                             |
|                                        | 750              | 1.56                                | 242                                  | 0.47                             |

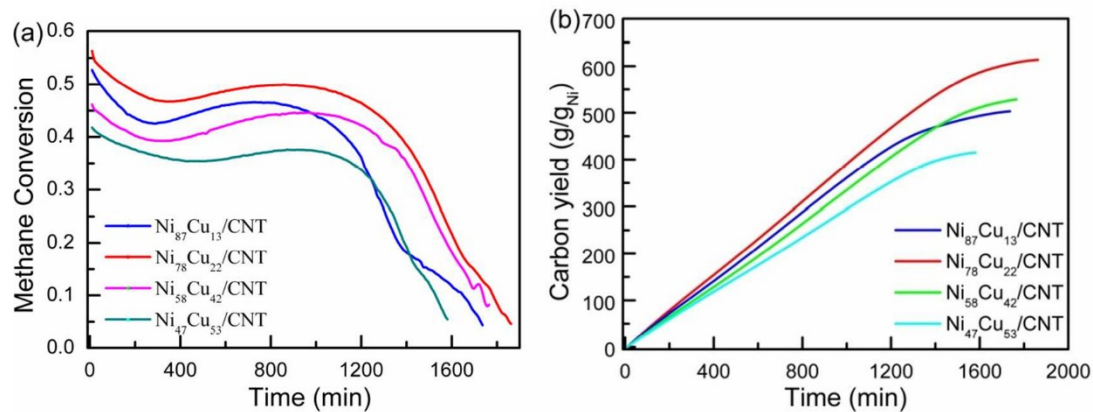

**Figure S1** (a) Methane conversion and (b) carbon yield over the catalysts as a function of reaction time. Experimental conditions: 5 mg of metallic nickel was involved in the catalysts; pure methane with a volume flow rate of 7.5 ml min<sup>-1</sup>; working temperature 700°C; weight hourly space velocity 59 g h<sup>-1</sup> g<sub>Ni</sub><sup>-1</sup>.

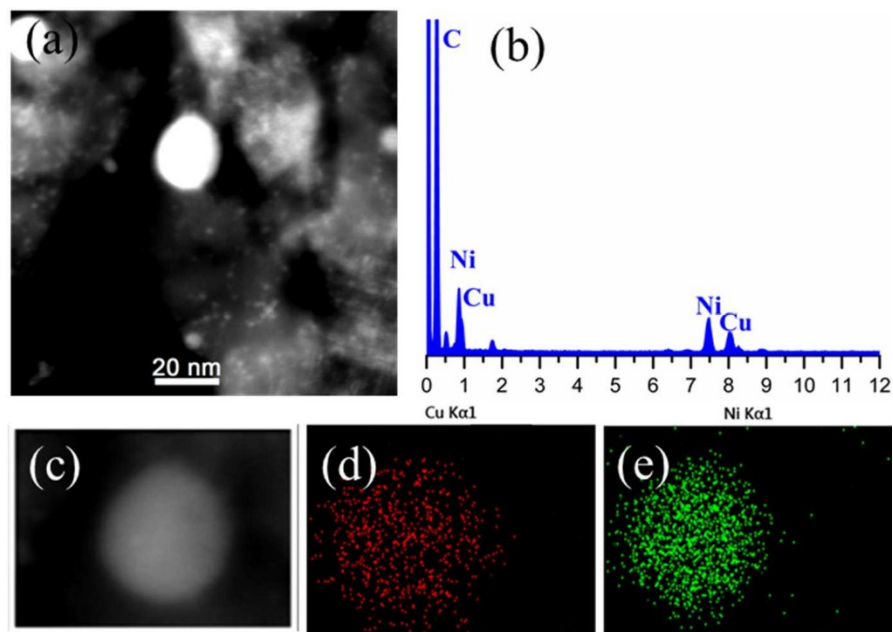

**Figure S2** (a) HAADF-STEM micrograph of the spent Ni<sub>78</sub>Cu<sub>22</sub>/CNT catalyst at 650°C, (b) EDS profile of NiCu nanoparticle, (c) HAADF-STEM image of a NiCu nanoparticle, (d) and (e) corresponding EELS elemental mappings of Ni and Cu, respectively.

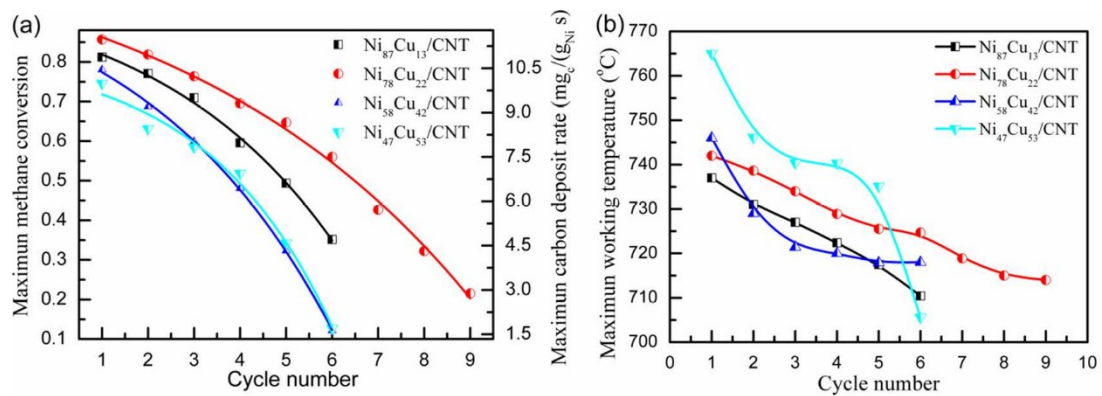

**Figure S3** (a) Maximum methane conversion and (b) working temperature of the catalysts as a function of cycle number under a cyclic heating-cooling temperature mode.

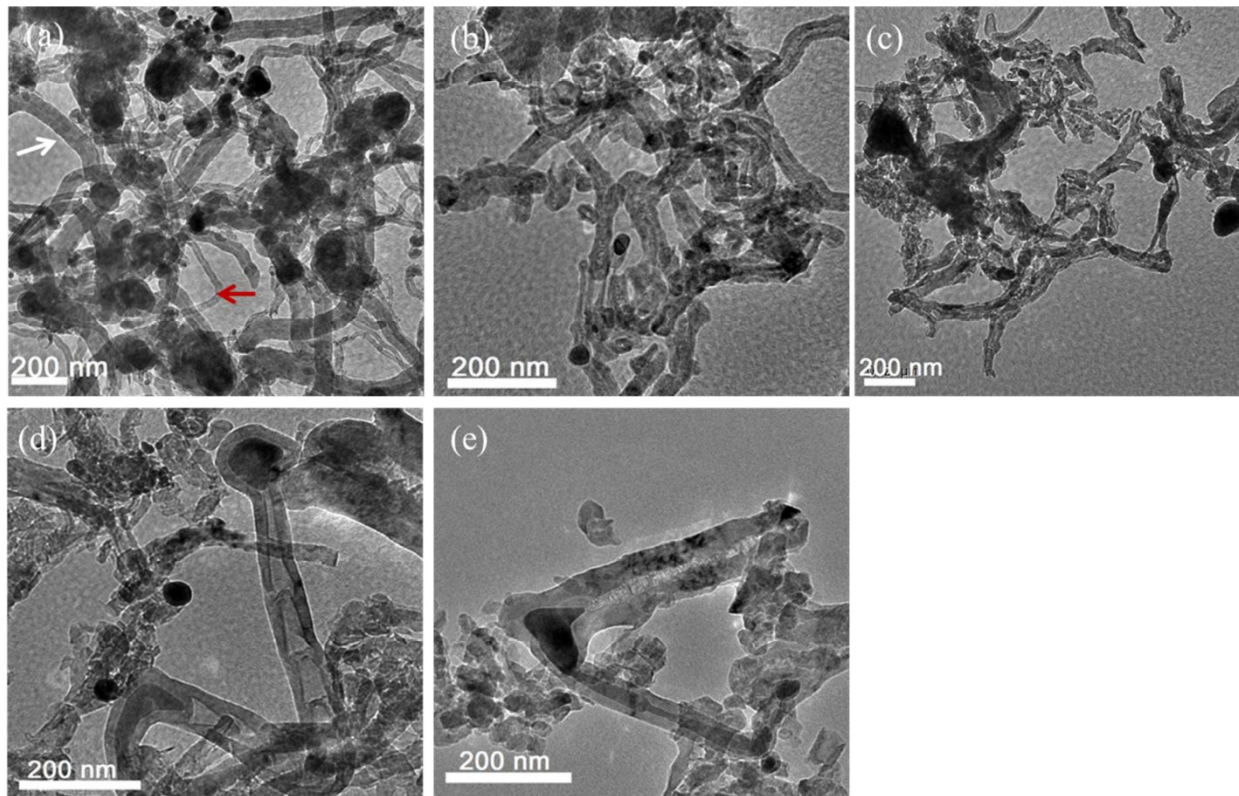

**Figure S4** TEM images of deactivated (a) CNT, (b)  $\text{Ni}_{87}\text{Cu}_{13}/\text{CNT}$ , (c)  $\text{Ni}_{78}\text{Cu}_{22}/\text{CNT}$ , (d)  $\text{Ni}_{58}\text{Cu}_{42}/\text{CNT}$  and (e)  $\text{Ni}_{47}\text{Cu}_{53}/\text{CNT}$  under a cyclic heating-cooling temperature mode.
